# Supplementary material for: Cross-Population Joint Analysis of eQTLs: Fine Mapping and Functional Annotation
Source: PubMed Central journal article supplement (PMC4408026; doi:10.1371/journal.pgen.1005176), 2015-04-23
Supplement: pgen.1005176.s007.pdf [file pgen.1005176.s007.pdf]

| Heterogeneity Level ( $\frac{\phi^2}{\phi^2+\omega^2}$ ) | Estimated Weight |
|----------------------------------------------------------|------------------|
| 0.0                                                      | 0.651            |
| 0.1                                                      | 0.204            |
| 0.2                                                      | 0.084            |
| 0.3                                                      | 0.035            |
| 0.4                                                      | 0.014            |
| 0.5                                                      | 0.006            |
| 0.6                                                      | 0.003            |
| 0.7                                                      | 0.002            |
| 0.8                                                      | 0.000            |
| 0.9                                                      | 0.000            |
| 1.0                                                      | 0.000            |
