# Supplementary material for: Cross-Population Joint Analysis of eQTLs: Fine Mapping and Functional Annotation
Source: PubMed Central journal article supplement (PMC4408026; doi:10.1371/journal.pgen.1005176), 2015-04-23
Supplement: pgen.1005176.s008.pdf [file pgen.1005176.s008.pdf]

| Method                         | Type I error   | Power             |                   |                   |
|--------------------------------|----------------|-------------------|-------------------|-------------------|
|                                | $\alpha_1 = 0$ | $\alpha_1 = 0.25$ | $\alpha_1 = 0.50$ | $\alpha_1 = 0.75$ |
| Multi-SNP PIP                  | 0.02           | 0.28              | 0.62              | 0.86              |
| <i>p</i> -value Classification | 0.01           | 0.12              | 0.17              | 0.33              |
